# Supplementary material for: Measuring the effect of the anti-nerve growth factor antibodies bedinvetmab and frunevetmab on quality of life in dogs and cats with osteoarthritis using a validated health-related quality of life outcome measure: an observational real-world study
Source: Frontiers journal article supplement (doi:10.3389/fvets.2024.1395360), 2024-08-14
Supplement: Data_Sheet_1.pdf [file Data_Sheet_1.pdf]

# VetMetrica Feline HRQL

## IMPORTANT INFORMATION

VetMetrica™ for cats is an online tool which provides a profile of scores in 3 domains of QOL – Vitality, Comfort and Emotional Wellbeing and these scores are generated automatically and instantaneously by a coded algorithm embedded in the Zoetis server. **Simply adding up the owner responses to each item will not generate a valid HRQL score.**

If you would like access to VetMetrica™ please use the contact us tab at [www.vetmetrica.com](http://www.vetmetrica.com)

Cat identification number

### Instructions

Welcome to the VETMETRICA Assessment for your cat.

Please take a few minutes to tell us how your cat acts and feels.

- Please do not think too long about your answer.
- You may find it helpful to read aloud the ends of the scale.
- Using a black pen, please clearly fill in the circle that best describes how your cat acts and feels.

**Please tell us how well this word describes your cat as he/she is today - Active**

0 1 2 3 4 5 6

Not at all active ☐ ☐ ☐ ☐ ☐ ☐ ☐ Couldn't be more active

**Please tell us how well this word describes your cat as he/she is today - Unsteady**

0 1 2 3 4 5 6

Not at all unsteady ☐ ☐ ☐ ☐ ☐ ☐ ☐ Couldn't be more unsteady

**Please tell us how well this word describes your cat as he/she is today - Energetic**

0 1 2 3 4 5 6

Not at all energetic ☐ ☐ ☐ ☐ ☐ ☐ ☐ Couldn't be more energetic

**Please tell us how well this word describes your cat as he/she is today - Comfortable**

0 1 2 3 4 5 6

Not at all comfortable ☐ ☐ ☐ ☐ ☐ ☐ ☐ Couldn't be more comfortable

**Please tell us how well this word describes your cat as he/she is today - Lethargic**

0 1 2 3 4 5 6

Not at all lethargic ☐ ☐ ☐ ☐ ☐ ☐ ☐ Couldn't be more lethargic

**Please tell us how well this word describes your cat as he/she is today – Showing hunting behaviour**

0 1 2 3 4 5 6

Not showing hunting behaviour at all ☐ ☐ ☐ ☐ ☐ ☐ ☐ Couldn't be showing hunting behaviour more

**Please tell us how well this word describes your cat as he/she is today - Lively**

0 1 2 3 4 5 6

Not at all lively ☐ ☐ ☐ ☐ ☐ ☐ ☐ Couldn't be more lively

**Please tell us how well this word describes your cat as he/she is today - Alert**

0 1 2 3 4 5 6

Not at all alert ☐ ☐ ☐ ☐ ☐ ☐ ☐ Couldn't be more alert

**Please tell us how well this word describes your cat as he/she is today - Sore**

0 1 2 3 4 5 6

Not at all sore ☐ ☐ ☐ ☐ ☐ ☐ ☐ Couldn't be more sore

**Please tell us how well this word describes your cat as he/she is today - Content**

0 1 2 3 4 5 6

Not at all content ☐ ☐ ☐ ☐ ☐ ☐ ☐ Couldn't be more content

**Please tell us how well this word describes your cat as he/she is today - Playful**

Not at all playful    0   1   2   3   4   5   6    Couldn't be more playful

**Please tell us how well this word describes your cat as he/she is today – Uncomfortable**

Not at all uncomfortable    0   1   2   3   4   5   6    Couldn't be more uncomfortable

**Please tell us how well this word describes your cat as he/she is today – Enjoying the thing he/she usually does**

Not enjoying the things he/she usually does at all    0   1   2   3   4   5   6    Couldn't be enjoying the things he/she usually does more

**Please tell us how well this word describes your cat as he/she is today - Jumping or climbing up/down as usual**

Not jumping or climbing up/down as usual at all    0   1   2   3   4   5   6    Jumping or climbing up/down as usual

**Please tell us how well this word describes your cat as he/she is today - Exploring**

Not exploring at all    0   1   2   3   4   5   6    Couldn't be exploring more

**Please tell us how well this word describes your cat as he/she is today - Feeling himself/herself**

Not feeling himself/herself at all    0   1   2   3   4   5   6    Couldn't be feeling more himself/herself

**Please tell us how well this word describes your cat as he/she is today - Stiff**

Not at all stiff    0   1   2   3   4   5   6    Couldn't be more stiff

**Please tell us how well this word describes your cat as he/she is today - Happy**

Not at all happy    0   1   2   3   4   5   6    Couldn't be more happy

**Please tell us how well this word describes your cat as he/she is today - Inquisitive**

Not at all inquisitive    0   1   2   3   4   5   6    Couldn't be more inquisitive

**Please tell us how well this word describes your cat as he/she is today - Slow**

Not at all slow    0   1   2   3   4   5   6    Couldn't be more slow
