# Supplementary material for: Measuring the effect of the anti-nerve growth factor antibodies bedinvetmab and frunevetmab on quality of life in dogs and cats with osteoarthritis using a validated health-related quality of life outcome measure: an observational real-world study
Source: Front Vet Sci. 2024 Aug 14;11:1395360. doi: 10.3389/fvets.2024.1395360 (PMC11349630; doi:10.3389/fvets.2024.1395360)
Supplement: Supplementary file 2 [file Data_Sheet_1.xlsx]

## Sheet: Worksheet 1
ID	weight	sex	Date of birth	Column_5	Column_6	Age	Completion	Vitality0	Comfort0	EWB0	PWB0	Vitality14	Comfort14	EWB14	PWB14	Vitality28	Comfort28	EWB28	PWB28	Vitality56	Comfort56	EWB56	PWB56	Vitality63	Comfort63	EWB63	PWB63	Vitality70	Comfort70	EWB70	PWB70
50490	5	Male neutered	2009-08-03	2009	2021	12	2021-07-06	29.62	29.99	10.4	29.805	29.87	30.58	9.27	30.225	28.51	32.55	20.42	30.53	38.14	38.7	32.45	38.42	37.81	43.72	22.91	40.765	33.18	38.31	30.83	35.745
50500	5	Male neutered	2004-05-05	2004	2021	17	2021-07-27	15.08	22.21	17.71	18.645	29.67	29.52	28.99	29.595	31.51	28.56	32.77	30.035	27.74	29.13	22.85	28.435	38.15	32.52	26.14	35.335	33.57	28.41	22.82	30.99
50501	4	Male neutered	2002-12-01	2002	2021	19	2021-08-03	2.92	23.29	0	13.105	15.66	27.11	9.8	21.385	1.79	21.73	3.64	11.76	19.37	26.04	16.12	22.705	25.37	26.42	18.2	25.895	35.68	27.62	20.33	31.65
50502	6	Male	2008-08-06	2008	2021	13	2021-08-14	39.93	28.54	19.6	34.235	49.19	51.96	51.25	50.575	44.23	44.84	58.84	44.535	8.69	21.83	0	15.26	32.6	26.07	15.13	29.335	34.82	35.2	37.5	35.01
50503	5	Male neutered	2007-04-08	2007	2021	14	2021-08-16	32.58	33.27	38.76	32.925	42.68	37.8	53	40.24	50.37	48.59	55.49	49.48	46.95	45.03	54.39	45.99	39.4	44.59	54.02	41.995	52.76	59.55	58.84	56.155
50504	4	Female neutered	2006-06-04	2006	2021	15	2021-08-19	36.48	22.38	22.48	29.43	38.9	29.79	26.84	34.345	30.69	27.12	15.59	28.905	40.33	27.64	36.72	33.985	40.08	28.66	23.74	34.37	42.72	30.95	30.98	36.835
50510	4	Female neutered	2004-08-01	2004	2021	17	2021-10-04	48.82	32.94	28.28	40.88	53.29	38.19	47.96	45.74	52.7	40.22	44.58	46.46	53.51	41.85	45.7	47.68	52.73	38.9	44.58	45.815	53.61	40.45	47.7	47.03
50512	4	Male neutered	2010-06-13	2010	2021	11	2021-10-12	23.16	24.29	9.87	23.725	49.05	31.55	45.91	40.3	56.67	44.37	54.67	50.52	53.44	43.15	51.16	48.295	49.15	27.94	34.85	38.545	47.62	32.39	40.65	40.005
50514	4	Female neutered	2008-05-20	2008	2021	13	2021-10-20	40.26	29.89	25.72	35.075	46.17	36.14	40.19	41.155	49.5	45.35	44.41	47.425	46.38	34.65	42.47	40.515	53.58	45.83	51.8	49.705	52.66	41	43.52	46.83
50515	4	Male	2007-10-23	2007	2021	14	2021-10-22	29.49	30.16	29.7	29.825	40.64	31.97	36.6	36.305	44.3	41.87	47.01	43.085	50.44	50.18	47.46	50.31	48.36	42.95	46.36	45.655	51.4	50.71	54.86	51.055
50516	4	Male neutered	2006-08-26	2006	2021	15	2021-10-22	28.81	30.36	30.98	29.585	40.27	28.8	35.7	34.535	29.29	28.17	32.95	28.73	37.87	29.69	37.33	33.78	13.94	24.22	0	19.08	25.32	24.22	3.6	24.77
50522	4	Female	2005-04-20	2005	2021	16	2021-11-02	17.82	23.49	9.84	20.655	14.04	23.93	7.83	18.985	17.13	23.08	3.52	20.105	29.3	27.26	22.91	28.28	22.38	27.69	12.13	25.035	26.38	28.42	19.69	27.4
50529	4	Male neutered	2006-01-01	2006	2021	15	2021-11-21	29.92	24.9	24.78	27.41	37.37	28.9	24.75	33.135	35.95	31.75	33.33	33.85	37.51	27.41	31.62	32.46	40.92	34.23	38.87	37.575	47.05	32.36	42.12	39.705
50530	4	Male neutered	2021-08-01	2021	2021	0	2021-12-06	27.2	24.25	6.36	25.725	49.63	31.76	40.54	40.695	34.01	27	23.56	30.505	40.43	29.49	38.38	34.96	41.13	29.55	29.35	35.34	35.76	26.32	37.62	31.04
50533	4	Female neutered	2006-04-14	2006	2021	15	2021-12-15	14.06	26.97	11.17	20.515	30.44	27.28	16.68	28.86	33.3	28.35	25.36	30.825	44.21	36.6	38.82	40.405	47.41	37.62	44.58	42.515	47.99	37.71	44.58	42.85
50534	4	Female neutered	2009-08-14	2009	2021	12	2021-12-18	38.5	22.71	35.87	30.605	42.24	26.83	37.36	34.535	49.82	28.95	47.7	39.385	43.56	31.01	36.45	37.285	52.79	30.12	43.11	41.455	48.24	28.99	39.69	38.615
50535	4	Female neutered	2011-01-04	2011	2021	10	2021-12-22	34.85	25.67	26.78	30.26	47.7	35.97	44.08	41.835	41.4	30.56	26.05	35.98	43.67	38.65	46.59	41.16	44.94	32.8	38.87	38.87	48.46	42.04	49.73	45.25
50536	4	Female neutered	2007-02-14	2007	2021	14	2021-12-24	33.02	32.94	28.01	32.98	35.6	35.63	48.41	35.615	36.29	40.18	52.38	38.235	32.86	34.52	41.5	33.69	35.98	34.15	42.88	35.065	36.6	32.39	35.67	34.495
50579	6	Female neutered	2006-08-30	2006	2022	16	2022-02-02	33.98	28.29	27.08	31.135	39.39	32.11	41.15	35.75	39.82	32.73	35.43	36.275	42.71	31.71	39.46	37.21	41.91	29.3	27.77	35.605	44.68	36.54	44.49	40.61
50582	4	Female neutered	2004-06-01	2004	2022	18	2022-02-09	32.66	27.23	25.66	29.945	20.75	24.16	8.41	22.455	21.1	27.36	26.45	24.23	31.36	25.67	21.2	28.515	33.63	28.35	26.42	30.99	26.18	28.55	28.81	27.365
50583	4	Male neutered	2005-09-30	2005	2022	17	2022-02-11	0	22.2	14.1	11.1	18.71	29.88	16.22	24.295	33.15	27.17	26.08	30.16	15.88	28.11	33.77	21.995	21.56	29.34	29.35	25.45	6.12	25.08	24.08	15.6
50585	5	Male	2003-04-06	2003	2022	19	2022-02-19	17.33	21.64	3.06	19.485	30.06	28.72	14.2	29.39	38.08	29.52	27.5	33.8	45.46	30.91	30.98	38.185	38.84	29.67	29.26	34.255	46.86	30.91	37.68	38.885
50591	5	Female neutered	2011-06-14	2011	2022	11	2022-03-05	36.2	28.25	20.39	32.225	48.55	36.71	41.24	42.63	53.96	38.8	44.58	46.38	51.95	34.75	43.2	43.35	60.14	52.47	58.84	56.305	62.99	55.04	57.32	59.015
50594	5	Male neutered	2016-05-20	2016	2022	6	2022-03-10	30.38	29.8	17.81	30.09	26.56	30.95	16.74	28.755	42.7	38.27	32.98	40.485	33.96	33.4	32.33	33.68	35.45	31.14	27.02	33.295	42.23	31.3	31.95	36.765
50601	4	Female	2008-06-01	2008	2022	14	2022-04-01	31.74	24.3	19.41	28.02	37.88	31.48	32.36	34.68	38.46	34.59	38.82	36.525	44.65	37.71	42.2	41.18	46.32	36.99	43.2	41.655	48.16	38.9	44.58	43.53
50602	4	Female	2012-01-20	2012	2022	10	2022-04-01	17.54	23.26	6.03	20.4	37.91	29.62	24.84	33.765	27.33	23.16	5.28	25.245	32.02	27.52	25.33	29.77	32.91	31.67	30.65	32.29	38.49	34.94	32.68	36.715
50604	5	Male neutered	2007-08-31	2007	2022	15	2022-04-11	22.27	23.38	0	22.825	49.76	34.47	43.11	42.115	52.7	37.51	44.58	45.105	56.41	38.9	49.4	47.655	31.78	24.56	0	28.17	35.92	29.33	17.1	32.625
50616	4	Male	2008-01-01	2008	2022	14	2022-04-26	14.18	25.82	0	20	20.1	23.31	13.19	21.705	25.58	26.64	19.25	26.11	38.47	25.25	30.62	31.86	40.05	26.8	28.01	33.425	39.09	32.55	39.55	35.82
50627	4	Male neutered	2009-07-04	2009	2022	13	2022-05-10	24.49	26.42	20.77	25.455	38.06	32.55	30.06	35.305	41.05	36.84	35.29	38.945	51.73	41.93	52.38	46.83	53.71	54.82	44.73	54.265	56.29	54.82	56.97	55.555
50645	5	Male	2006-11-21	2006	2022	16	2022-06-06	27.46	25.37	18.16	26.415	24.7	25.51	22.91	25.105	17.46	25.23	9.8	21.345	38.47	30.91	23.77	34.69	35.84	27.82	23.37	31.83	29.23	25.78	15.92	27.505
50646	4	Female neutered	2022-06-02	2022	2022	0	2022-06-07	17.61	25.39	11.75	21.5	24.26	25.16	16.58	24.71	22.96	24.47	9.59	23.715	34.75	26.59	16.68	30.67	39.19	31.18	22.26	35.185	40.76	33.42	32.45	37.09
50654	5	Male neutered	2007-04-01	2007	2022	15	2022-06-14	25.09	25.95	13.56	25.52	46.56	37.65	41.59	42.105	53.09	45.27	48.5	49.18	52.73	47.49	47.78	50.11	53.76	50.71	51.92	52.235	56.2	51.79	50.52	53.995
50656	5	Male neutered	2008-01-04	2008	2022	14	2022-06-16	27.4	24.32	8.08	25.86	35.7	25.72	16.97	30.71	38.19	34.18	24.48	36.185	35.91	26.2	15.13	31.055	42	30.06	28.3	36.03	42.67	27.59	27.26	35.13
50662	4	Female neutered	2014-05-28	2014	2022	8	2022-06-19	25.78	26.2	20.36	25.99	58.81	51.96	55.83	55.385	59.88	59.55	58.84	59.715	54.47	55.04	57.32	54.755	60.18	59.55	58.84	59.865	60.01	59.55	58.84	59.78
50671	6	Male neutered	2003-06-01	2003	2022	19	2022-06-25	24.15	26.07	14.67	25.11	32.52	31.43	34.7	31.975	30.86	32.65	46.98	31.755	41.73	49.64	58.84	45.685	37.96	40.84	58.84	39.4	33.46	37.3	58.84	35.38
50675	5	Male	2012-05-31	2012	2022	10	2022-06-28	33.5	30.5	11.89	32	31.41	32.16	24.9	31.785	34.31	29.01	18.2	31.66	23.25	23.52	7.03	23.385	28.88	25.98	16.68	27.43	33.05	27.62	15.53	30.335
50684	4	Female neutered	2005-04-29	2005	2022	17	2022-07-02	8.86	20.67	4.64	14.765	45.49	27.32	35.49	36.405	47.91	27.07	29.76	37.49	61.75	40.7	54.67	51.225	50.02	37.33	36.37	43.675	50.31	36.22	34.53	43.265
50693	3	Female neutered	2005-08-01	2005	2022	17	2022-07-14	20.57	26.03	24.81	23.3	36.96	28.62	27.83	32.79	33.88	29.7	30.77	31.79	37.66	30.63	33.21	34.145	42.04	32.07	26.81	37.055	41.22	27.23	30.27	34.225
50707	5	Female	2013-06-10	2013	2022	9	2022-07-25	46.62	31.47	27.83	39.045	44.73	28.15	28.45	36.44	52.96	39.3	40.92	46.13	46.93	34.09	32.36	40.51	52.5	38.9	44.58	45.7	54.38	40.47	46.56	47.425
50710	5	Male neutered	2017-07-09	2017	2022	5	2022-08-02	53.5	25.07	36.05	39.285	63.37	53.01	56.69	58.19	63.99	41.36	49.49	52.675	60.36	59.55	46.45	59.955	63.99	59.55	58.84	61.77	63.99	59.55	58.84	61.77
50723	4	Female neutered	2008-06-18	2008	2022	14	2022-08-11	39.24	36.18	37.15	37.71	47.51	35.48	42.61	41.495	52.7	40.22	51.86	46.46	55.01	33.54	51.95	44.275	57.02	47.07	52.38	52.045	55.21	50.71	49.86	52.96
50731	5	Male neutered	2008-02-20	2008	2022	14	2022-08-20	38.94	25.33	17.71	32.135	49.43	32.81	37.13	41.12	52.61	38.9	44.58	45.755	50.56	38.9	42.2	44.73	54.53	40.22	44.58	47.375	54.53	38.9	44.58	46.715
50737	4	Male neutered	2008-07-02	2008	2022	14	2022-08-31	37	25.83	30.68	31.415	30.49	26.42	22.45	28.455	46.03	36.37	39.11	41.2	43.93	37.6	36.75	40.765	45.11	36.28	37.18	40.695	15.43	27.42	0	21.425
50740	3	Male neutered	2005-01-01	2005	2022	17	2022-09-03	0.72	24.45	12.37	12.585	13.58	24.41	9.55	18.995	19.65	27.36	6.25	23.505	21.6	26.62	4.98	24.11	27.23	29.24	13.59	28.235	30.61	29.24	13.39	29.925
50762	6	Female neutered	2007-04-01	2007	2022	15	2022-10-09	38.6	31.42	36.69	35.01	42.72	33.89	44.94	38.305	45.25	28.7	38.09	36.975	39.66	30.09	30.98	34.875	49.06	33.92	43.2	41.49	51.52	32.89	44.58	42.205
50765	3	Female neutered	2006-05-29	2006	2022	16	2022-10-21	56.53	59.55	43.88	58.04	53.23	41.61	34.97	47.42	50.77	51.63	31.89	51.2	35.26	46.47	27.83	40.865	42.88	39.92	30.44	41.4	44.93	49.21	34.53	47.07
50767	5	Female	2007-05-05	2007	2022	15	2022-11-07	44.21	26.4	30.47	35.305	50.8	34.8	39.37	42.8	36.03	26.59	19.25	31.31	63.32	49.08	58.84	56.2	53.83	32.5	46.95	43.165	51.7	35.38	44.58	43.54
50768	4	Male neutered	2009-08-09	2009	2022	13	2022-11-19	41.88	37.69	31.06	39.785	58.38	43.69	40.25	51.035	56.87	48.12	50.19	52.495	53.75	45.99	49.04	49.87	59.67	55.04	45.79	57.355	61.34	59.55	56.69	60.445
50789	3	Male neutered	2008-03-01	2008	2023	15	2023-01-10	32.56	27.49	21.45	30.025	37.95	31.7	30.98	34.825	39.73	31.18	24.41	35.455	38.42	30.42	29.58	34.42	37.05	28.96	25.15	33.005	39.21	30.42	29.58	34.815
50793	7	Male neutered	2011-08-28	2011	2023	12	2023-02-02	21.54	22.28	19.69	21.91	29.48	29.43	29.64	29.455	34.17	33.04	30.74	33.605	42.44	37.16	38.15	39.8	47.32	37.02	42.88	42.17	44.46	40.8	50.52	42.63
50796	4	Female neutered	2015-05-28	2015	2023	8	2023-02-09	33.76	24.31	13.46	29.035	35.91	27.07	26.11	31.49	39.76	27.7	18.55	33.73	34.15	28.62	25.42	31.385	38.46	27.19	8.52	32.825	43.65	30.37	25.48	37.01
50799	5	Male neutered	2010-10-01	2010	2023	13	2023-02-11	25.09	32.01	30.3	28.55	38.78	32.76	33.42	35.77	47.42	36.93	38.41	42.175	54.18	45.59	50.92	49.885	49.16	44.1	47.04	46.63	62.9	55.04	57.32	58.97
50800	6	Male neutered	2008-09-09	2008	2023	15	2023-02-13	8.46	19.39	0	13.925	31.69	27.59	22.88	29.64	26.28	29.7	26.87	27.99	38.8	33.36	42.61	36.08	43.17	34.33	44.49	38.75	43.8	35.2	42.09	39.5
50806	6	Female	2022-08-20	2022	2023	1	2023-02-20	7.3	18.55	0	12.925	13.58	23.24	10.01	18.41	18.6	22.92	9.13	20.76	19.73	24.97	17.39	22.35	20.79	27.75	18.26	24.27	20.73	24.82	19.06	22.775
50809	4	Female neutered	2011-07-27	2011	2023	12	2023-03-03	29.18	30.06	16.68	29.62	46.27	39.51	47.04	42.89	46.37	42.63	44.35	44.5	47.31	45.8	44.08	46.555	47.46	41.78	46.06	44.62	52.98	47.39	51.95	50.185
50811	3	Female neutered	2010-10-07	2010	2023	13	2023-03-22	30.92	25.06	32.71	27.99	52.44	41.78	44.58	47.11	54.93	46.77	55.11	50.85	41.22	25.71	35.99	33.465	42.58	27.76	40.19	35.17	49.9	32.59	47.01	41.245
